# Supplementary material for: Bi-functional peptide-based 3D hydrogel-scaffolds
Source: Royal Society of Chemistry journal article supplement (doi:10.1039/d0sm00825g), 2020-01-01
Supplement: d0sm00825g1.pdf [file d0sm00825g1.pdf]

## Bi-functional Peptide-based 3D hydrogel-scaffolds

Carlo Diaferia,<sup>1,‡</sup> Francesca Netti<sup>2,‡</sup>, Moumita Ghosh<sup>2</sup>, Teresa Sibillano,<sup>3</sup> Cinzia Giannini,<sup>3</sup>  
Giancarlo Morelli,<sup>1</sup> Lihi Adler-Abramovich,<sup>2,\*</sup> Antonella Accardo<sup>1,\*</sup>

<sup>1</sup>Department of Pharmacy, Research Centre on Bioactive Peptides (CIRPeB), University of Naples “Federico II”, Via Mezzocannone 16, 80134-Naples, Italy

<sup>2</sup>Department of Oral Biology, The Goldschleger School of Dental Medicine, Sackler Faculty of Medicine, and the Center for Nanoscience and Nanotechnology Tel-Aviv University 69978, Israel.

<sup>3</sup>Institute of Crystallography (IC), CNR, Via Amendola 122, 70126 Bari, Italy.

\*Correspondence to: [antonella.accardo@unina.it](mailto:antonella.accardo@unina.it); [LihiA@tauex.tau.ac.il](mailto:LihiA@tauex.tau.ac.il)

‡ These author contributed equally to this work

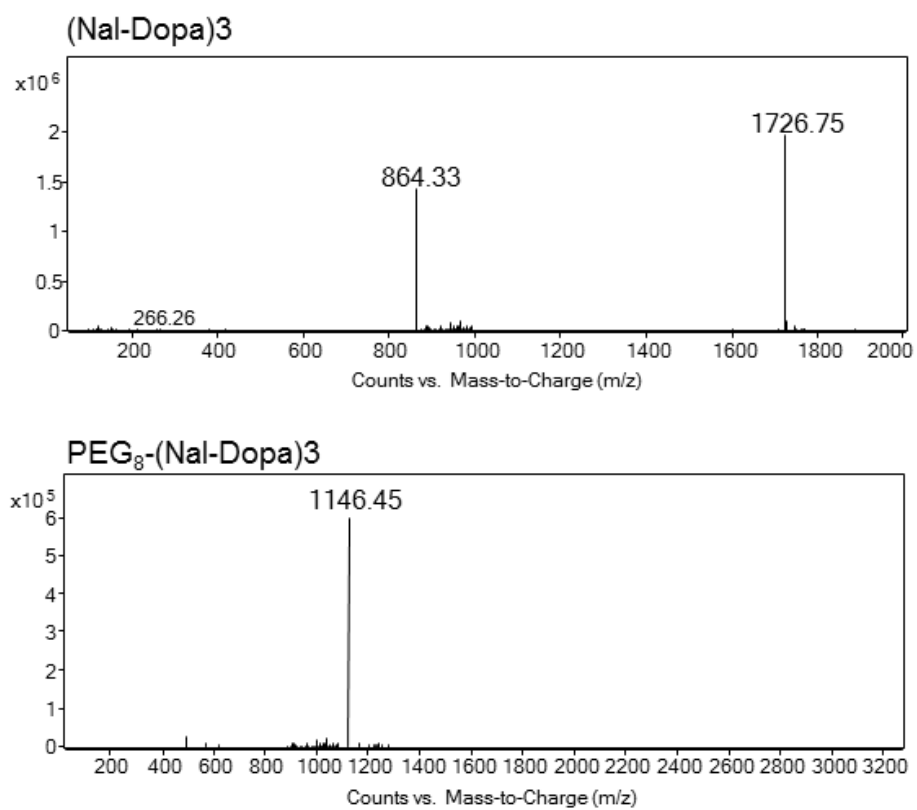

**Figure S1:**RP-HPLC chromatograms and ESI mass spectra for (Nal-Dopa)<sub>3</sub> and Peg<sub>8</sub>-(Nal-Dopa)<sub>3</sub>.

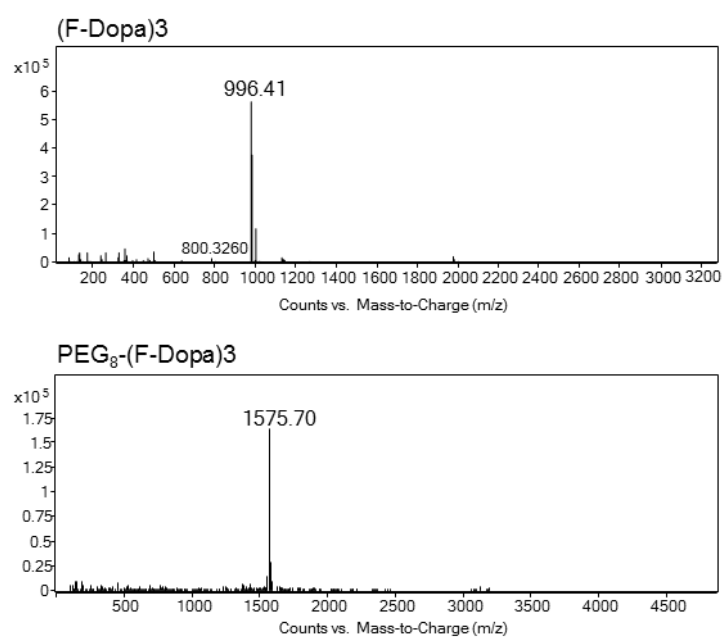

**Figure S2:** RP-HPLC chromatograms and ESI mass spectra for (F-Dopa)<sub>3</sub> and Peg<sub>8</sub>-(F-Dopa)<sub>3</sub>.

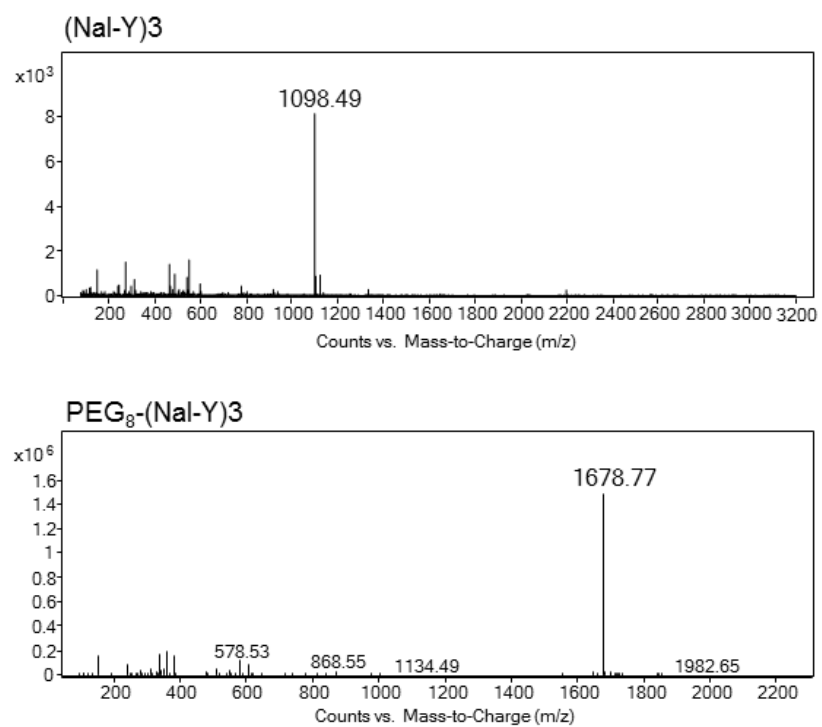

**Figure S3:** RP-HPLC chromatograms and ESI mass spectra for (Nal-Y)<sub>3</sub> and Peg<sub>8</sub>-(Nal-Y)<sub>3</sub>.

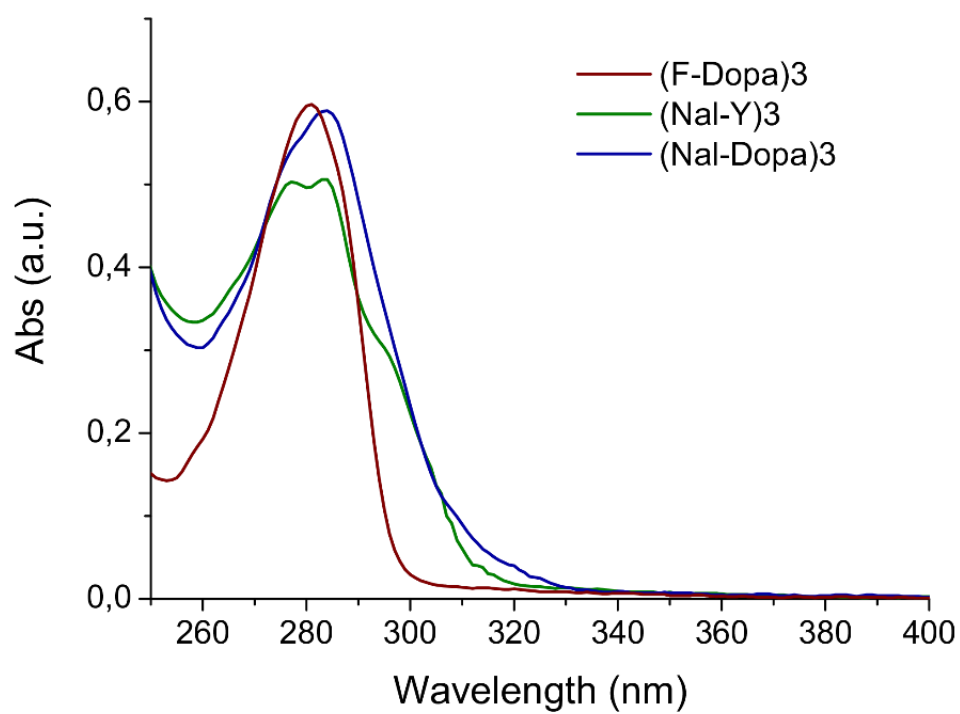

**Figure S4:** UV-Vis spectra of (F-Dopa)<sub>3</sub>, (Nal-Y)<sub>3</sub> and (Nal-Dopa)<sub>3</sub> peptides recorded between 250 and 400 nm.

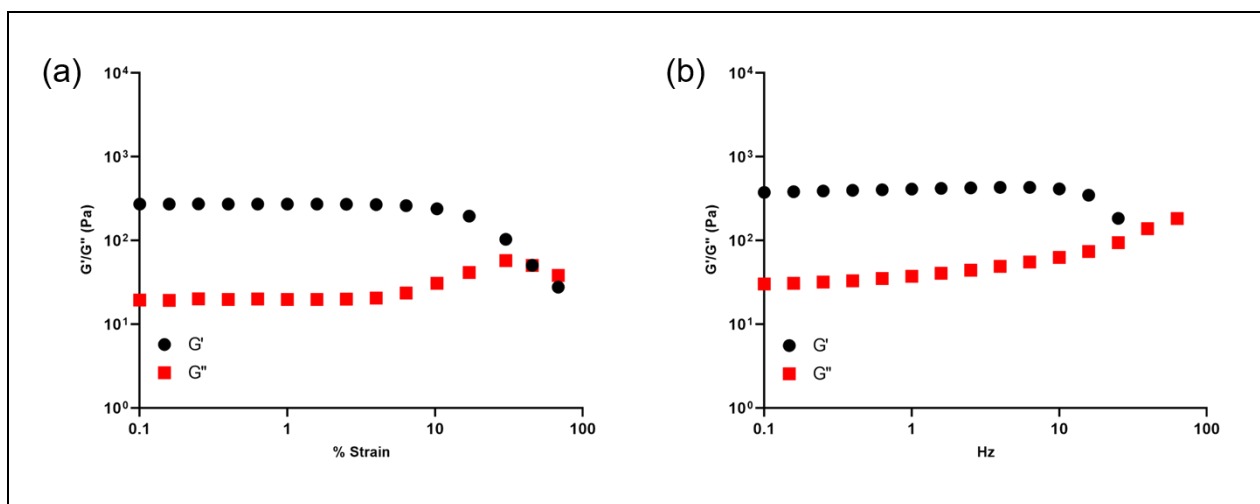

**Figure S5:** Rheological analysis of (Nal-Dopa)3 hydrogel (a) Dynamic strain sweep oscillatory test performed at 1 Hz frequency. (b) Dynamic frequency sweep oscillatory test performed at 0.1 % strain of (Nal-Dopa)3 hydrogel.
